# Supplementary material
Source: MDPI journal article supplement (https://www.mdpi.com/2674-0583/1/1/8)
Supplement: s1 [file s1 › synbio-2330921-supplementary.pdf]

# **Rapid Production of Cyclic Citrullinated Peptide Monoclonal Antibody in *Nicotiana benthamiana* for the Early Detection and Diagnosis of Rheumatoid Arthritis**

**Van Giap Do**

Apple Research Institute, National Institute of Horticultural and Herbal Science,  
Rural Development Administration, Gunwi 39000, Republic of Korea

## **Supplementary Data**

- Table S1. Amino acid sequence of the synthetic CCP and CRP peptide
- Figure S1. DNA sequence agliment of CCP-LC
- Figure S2. DNA sequence agliment of CCP-HC
- Figure S3. Cloning and construction of expression vectors for CCP-LC
- Figure S4. Cloning and construction of expression vectors for CCP-HC

**Table S1.** Amino acid sequence of the synthetic CCP and CRP peptide

| Peptide | Amino acid sequence                              | Note                                                                                                   |
|---------|--------------------------------------------------|--------------------------------------------------------------------------------------------------------|
| CRP     | HQ <u>CH</u> QEST <u>R</u> GRSRGR <u>C</u> GRSGS | Non-citrullinated peptide (CRP) is arginine ( <b>R</b> ) was changed to citrulline ( <b>X</b> ) in CCP |
| CCP     | HQ <u>CH</u> QEST <b>X</b> GRSRGR <u>C</u> GRSGS | <b>X</b> stands for citruline amino acid, forming a chemical bond between 2 underline C in the peptide |

OK

2014.5.13 Page 1

DNASIS  
Simple Homology Region [mAbCCP LC (BIXI-KIBISI)]

| No.                                                                     | Target File                                                           | Mode | Key | Target | Overlap | Match | Percentage |
|-------------------------------------------------------------------------|-----------------------------------------------------------------------|------|-----|--------|---------|-------|------------|
| 1                                                                       | CCP LC1-T7                                                            | N    | 1   | 52     | 751     | 751   | 100.00%    |
| 1                                                                       | 10                                                                    | 20   | 30  | 40     | 50      | 60    | 70         |
| 5'                                                                      | TTTGGTCTCAAGGTTCTAGAAATGGTATCCACAGCTCAGTTTCTTGAATCTTGTTGCTCTGGTTTCCAG |      |     |        |         |       |            |
| *****                                                                   |                                                                       |      |     |        |         |       |            |
| 5'                                                                      | TTTGGTCTCAAGGTTCTAGAAATGGTATCCACAGCTCAGTTTCTTGAATCTTGTTGCTCTGGTTTCCAG |      |     |        |         |       |            |
| 52                                                                      | 61                                                                    | 71   | 81  | 91     | 101     | 111   | 121        |
| 71                                                                      | 80                                                                    | 90   | 100 | 110    | 120     | 130   | 140        |
| GTATCAAATGTGACATCAAGATGACCCAGTCTCCATCTTCCATGTATGCATCTCTAGGAGAGAGAGTAC   |                                                                       |      |     |        |         |       |            |
| *****                                                                   |                                                                       |      |     |        |         |       |            |
| GTATCAAATGTGACATCAAGATGACCCAGTCTCCATCTTCCATGTATGCATCTCTAGGAGAGAGAGTAC   |                                                                       |      |     |        |         |       |            |
| 122                                                                     | 131                                                                   | 141  | 151 | 161    | 171     | 181   | 191        |
| 141                                                                     | 150                                                                   | 160  | 170 | 180    | 190     | 200   | 210        |
| TATCACTTGCAAGGCGAGTCAGGACATTAATAGCTATTTAAGCTGGTTCCAGCAGAAACAGGGAAATCT   |                                                                       |      |     |        |         |       |            |
| *****                                                                   |                                                                       |      |     |        |         |       |            |
| TATCACTTGCAAGGCGAGTCAGGACATTAATAGCTATTTAAGCTGGTTCCAGCAGAAACAGGGAAATCT   |                                                                       |      |     |        |         |       |            |
| 192                                                                     | 201                                                                   | 211  | 221 | 231    | 241     | 251   | 261        |
| 211                                                                     | 220                                                                   | 230  | 240 | 250    | 260     | 270   | 280        |
| CCTAAGACCTGATCTATCGTGCAAACAGATTTGGTAGATGGGGTCCCATCAAGGTTCAAGTGGCAGTGGAT |                                                                       |      |     |        |         |       |            |
| *****                                                                   |                                                                       |      |     |        |         |       |            |
| CCTAAGACCTGATCTATCGTGCAAACAGATTTGGTAGATGGGGTCCCATCAAGGTTCAAGTGGCAGTGGAT |                                                                       |      |     |        |         |       |            |
| 262                                                                     | 271                                                                   | 281  | 291 | 301    | 311     | 321   | 331        |
| 281                                                                     | 290                                                                   | 300  | 310 | 320    | 330     | 340   | 350        |
| CTGGGCAAGATTATCTCTCACCATCAGCAGCCTGGAGTATGAAGATATGGGAATTTATTATGTCTACA    |                                                                       |      |     |        |         |       |            |
| *****                                                                   |                                                                       |      |     |        |         |       |            |
| CTGGGCAAGATTATCTCTCACCATCAGCAGCCTGGAGTATGAAGATATGGGAATTTATTATGTCTACA    |                                                                       |      |     |        |         |       |            |
| 332                                                                     | 341                                                                   | 351  | 361 | 371    | 381     | 391   | 401        |
| 351                                                                     | 360                                                                   | 370  | 380 | 390    | 400     | 410   | 420        |
| GTATGATGAGTTTCCGTGGACGTTCCGTGGAGGCACCAAGCTGGAATCAAACGGGCTGATGCTGCACCA   |                                                                       |      |     |        |         |       |            |
| *****                                                                   |                                                                       |      |     |        |         |       |            |
| GTATGATGAGTTTCCGTGGACGTTCCGTGGAGGCACCAAGCTGGAATCAAACGGGCTGATGCTGCACCA   |                                                                       |      |     |        |         |       |            |
| 402                                                                     | 411                                                                   | 421  | 431 | 441    | 451     | 461   | 471        |
| 421                                                                     | 430                                                                   | 440  | 450 | 460    | 470     | 480   | 490        |
| ACTGTATCCATCTTCCCACCATCCAGTGAGCAGTTAACATCTGGAGGTGCCTCAGTCGTGTGCTTCTTGA  |                                                                       |      |     |        |         |       |            |
| *****                                                                   |                                                                       |      |     |        |         |       |            |
| ACTGTATCCATCTTCCCACCATCCAGTGAGCAGTTAACATCTGGAGGTGCCTCAGTCGTGTGCTTCTTGA  |                                                                       |      |     |        |         |       |            |
| 472                                                                     | 481                                                                   | 491  | 501 | 511    | 521     | 531   | 541        |
| 491                                                                     | 500                                                                   | 510  | 520 | 530    | 540     | 550   | 560        |
| ACAACTTCTACCCCAAAGACATCAATGTCAAGTGAAGATTGATGGCAGTGAACGACAAAATGGCGTCCT   |                                                                       |      |     |        |         |       |            |
| *****                                                                   |                                                                       |      |     |        |         |       |            |
| ACAACTTCTACCCCAAAGACATCAATGTCAAGTGAAGATTGATGGCAGTGAACGACAAAATGGCGTCCT   |                                                                       |      |     |        |         |       |            |
| 542                                                                     | 551                                                                   | 561  | 571 | 581    | 591     | 601   | 611        |
| 561                                                                     | 570                                                                   | 580  | 590 | 600    | 610     | 620   | 630        |
| GAACAGTTGGACTGATCAGGACAGCAAAGACAGCACCTACAGCATGAGCAGCACCCCTCAGTTGACCAAG  |                                                                       |      |     |        |         |       |            |
| *****                                                                   |                                                                       |      |     |        |         |       |            |
| GAACAGTTGGACTGATCAGGACAGCAAAGACAGCACCTACAGCATGAGCAGCACCCCTCAGTTGACCAAG  |                                                                       |      |     |        |         |       |            |
| 612                                                                     | 621                                                                   | 631  | 641 | 651    | 661     | 671   | 681        |
| 631                                                                     | 640                                                                   | 650  | 660 | 670    | 680     | 690   | 700        |
| GACGAGTATGAACGACATAACAGCTATACCTGTGAGGCCACTCACAAGACATCAACTTCACCCATGTGTA  |                                                                       |      |     |        |         |       |            |
| *****                                                                   |                                                                       |      |     |        |         |       |            |
| GACGAGTATGAACGACATAACAGCTATACCTGTGAGGCCACTCACAAGACATCAACTTCACCCATGTGTA  |                                                                       |      |     |        |         |       |            |
| 682                                                                     | 691                                                                   | 701  | 711 | 721    | 731     | 741   | 751        |
| 701                                                                     | 710                                                                   | 720  | 730 | 740    | 750     |       |            |
| AGAGCTTCAACAGGAATGAGTGTGTGATAGGTACCGCTTTGAGACCGAGCTC 3'                 |                                                                       |      |     |        |         |       |            |
| *****                                                                   |                                                                       |      |     |        |         |       |            |
| AGAGCTTCAACAGGAATGAGTGTGTGATAGGTACCGCTTTGAGACCGAGCTC 3'                 |                                                                       |      |     |        |         |       |            |
| 752                                                                     | 761                                                                   | 771  | 781 | 791    | 801     |       |            |

Cont.

# Supplementary Data

| Simple Homology Region [mAbCCP LC (BIXI-KIBISI)]                         |                                                                        |      |     |        |         |       |            |
|--------------------------------------------------------------------------|------------------------------------------------------------------------|------|-----|--------|---------|-------|------------|
| No.                                                                      | Target File                                                            | Mode | Key | Target | Overlap | Match | Percentage |
| 1                                                                        | CCP LC1-SP6                                                            | C    | 1   | 74     | 751     | 751   | 100.00%    |
| 1                                                                        | 10                                                                     | 20   | 30  | 40     | 50      | 60    | 70         |
| 5'                                                                       | GAGCTCGGTCTCAAAGCGGTACCTATCAACACTCATTCCTGTTGAAGCTCTTGACAATGGGTGAAGTTGA |      |     |        |         |       |            |
| *****                                                                    |                                                                        |      |     |        |         |       |            |
| 5'                                                                       | GAGCTCGGTCTCAAAGCGGTACCTATCAACACTCATTCCTGTTGAAGCTCTTGACAATGGGTGAAGTTGA |      |     |        |         |       |            |
| 74                                                                       | 83                                                                     | 93   | 103 | 113    | 123     | 133   | 143        |
| 71                                                                       | 80                                                                     | 90   | 100 | 110    | 120     | 130   | 140        |
| TGTCCTTGAGTGGCCTCACAGGTATAGCTGTTATGTCGTTTCATACTCGTCCTTGGTCAACGTGAGGGTG   |                                                                        |      |     |        |         |       |            |
| *****                                                                    |                                                                        |      |     |        |         |       |            |
| TGTCCTTGAGTGGCCTCACAGGTATAGCTGTTATGTCGTTTCATACTCGTCCTTGGTCAACGTGAGGGTG   |                                                                        |      |     |        |         |       |            |
| 144                                                                      | 153                                                                    | 163  | 173 | 183    | 193     | 203   | 213        |
| 141                                                                      | 150                                                                    | 160  | 170 | 180    | 190     | 200   | 210        |
| CTGCTCATGCTGTAGGTGCTGCTCTTTGCTGTCTTGATCAGTCCAAGTGTTCAGGACGCCAATTTGTCTGTT |                                                                        |      |     |        |         |       |            |
| *****                                                                    |                                                                        |      |     |        |         |       |            |
| CTGCTCATGCTGTAGGTGCTGCTCTTTGCTGTCTTGATCAGTCCAAGTGTTCAGGACGCCAATTTGTCTGTT |                                                                        |      |     |        |         |       |            |
| 214                                                                      | 223                                                                    | 233  | 243 | 253    | 263     | 273   | 283        |
| 211                                                                      | 220                                                                    | 230  | 240 | 250    | 260     | 270   | 280        |
| CACTGCCATCAATCTTCCACTTGACATTTGATGCTTTGGGGTAGAAGTTGTTCAAGAAGCACACGACTGA   |                                                                        |      |     |        |         |       |            |
| *****                                                                    |                                                                        |      |     |        |         |       |            |
| CACTGCCATCAATCTTCCACTTGACATTTGATGCTTTGGGGTAGAAGTTGTTCAAGAAGCACACGACTGA   |                                                                        |      |     |        |         |       |            |
| 284                                                                      | 293                                                                    | 303  | 313 | 323    | 333     | 343   | 353        |
| 281                                                                      | 290                                                                    | 300  | 310 | 320    | 330     | 340   | 350        |
| GGCACCTCCAGATGTTAACTGCTCACTGGATGGTGGGAAGATGGATACAGTTGGTGCAGCATCAGCCCGT   |                                                                        |      |     |        |         |       |            |
| *****                                                                    |                                                                        |      |     |        |         |       |            |
| GGCACCTCCAGATGTTAACTGCTCACTGGATGGTGGGAAGATGGATACAGTTGGTGCAGCATCAGCCCGT   |                                                                        |      |     |        |         |       |            |
| 354                                                                      | 363                                                                    | 373  | 383 | 393    | 403     | 413   | 423        |
| 351                                                                      | 360                                                                    | 370  | 380 | 390    | 400     | 410   | 420        |
| TTGATTTCCAGCTTGGTGCCTCCACCGAACGTCCACGAACTCATCATACTGTAGACAATAATAAATTC     |                                                                        |      |     |        |         |       |            |
| *****                                                                    |                                                                        |      |     |        |         |       |            |
| TTGATTTCCAGCTTGGTGCCTCCACCGAACGTCCACGAACTCATCATACTGTAGACAATAATAAATTC     |                                                                        |      |     |        |         |       |            |
| 424                                                                      | 433                                                                    | 443  | 453 | 463    | 473     | 483   | 493        |
| 421                                                                      | 430                                                                    | 440  | 450 | 460    | 470     | 480   | 490        |
| CCATATCTTCATACTCCAGGCTGCTGATGGTGAGAGAATAATCTTGCCAGATCCACTGCCACTGAACCT    |                                                                        |      |     |        |         |       |            |
| *****                                                                    |                                                                        |      |     |        |         |       |            |
| CCATATCTTCATACTCCAGGCTGCTGATGGTGAGAGAATAATCTTGCCAGATCCACTGCCACTGAACCT    |                                                                        |      |     |        |         |       |            |
| 494                                                                      | 503                                                                    | 513  | 523 | 533    | 543     | 553   | 563        |
| 491                                                                      | 500                                                                    | 510  | 520 | 530    | 540     | 550   | 560        |
| TGATGGGACCCCATCTACCAATCTGTTTGACGATAGATCAGGGTCTTAGGAGATTTCCTGGTTTCTGTC    |                                                                        |      |     |        |         |       |            |
| *****                                                                    |                                                                        |      |     |        |         |       |            |
| TGATGGGACCCCATCTACCAATCTGTTTGACGATAGATCAGGGTCTTAGGAGATTTCCTGGTTTCTGTC    |                                                                        |      |     |        |         |       |            |
| 564                                                                      | 573                                                                    | 583  | 593 | 603    | 613     | 623   | 633        |
| 561                                                                      | 570                                                                    | 580  | 590 | 600    | 610     | 620   | 630        |
| TGGAACCAGCTTAAATAGCTATTAATGTCCTGACTCGCCTTGCAAGTGATAGTACTCTCTCTCCTAGAG    |                                                                        |      |     |        |         |       |            |
| *****                                                                    |                                                                        |      |     |        |         |       |            |
| TGGAACCAGCTTAAATAGCTATTAATGTCCTGACTCGCCTTGCAAGTGATAGTACTCTCTCTCCTAGAG    |                                                                        |      |     |        |         |       |            |
| 634                                                                      | 643                                                                    | 653  | 663 | 673    | 683     | 693   | 703        |
| 631                                                                      | 640                                                                    | 650  | 660 | 670    | 680     | 690   | 700        |
| ATGCATACATGGAAGATGGAGACTGGGTCATCTTGATGTCACATTTGATACCTGGAAACCAGAGCAACAA   |                                                                        |      |     |        |         |       |            |
| *****                                                                    |                                                                        |      |     |        |         |       |            |
| ATGCATACATGGAAGATGGAGACTGGGTCATCTTGATGTCACATTTGATACCTGGAAACCAGAGCAACAA   |                                                                        |      |     |        |         |       |            |
| 704                                                                      | 713                                                                    | 723  | 733 | 743    | 753     | 763   | 773        |
| 701                                                                      | 710                                                                    | 720  | 730 | 740    | 750     | 3'    |            |
| GATTCCAAGAACTGAGCTGTGGATACCATTTCTAGAACCTTGAGACCAAAA                      |                                                                        |      |     |        |         |       |            |
| *****                                                                    |                                                                        |      |     |        |         |       |            |
| GATTCCAAGAACTGAGCTGTGGATACCATTTCTAGAACCTTGAGACCAAAA                      |                                                                        |      |     |        |         |       |            |
| 774                                                                      | 783                                                                    | 793  | 803 | 813    | 823     | 3'    |            |

**Figure S1.** DNA sequence agliment of CCP-LC using SP6 and T7 primer.

# Supplementary Data

| No. | Target File                                                            | Mode | Key | Target | Overlap | Match | Percentage |
|-----|------------------------------------------------------------------------|------|-----|--------|---------|-------|------------|
| 1   | CCP HC11-T7                                                            | N    | 1   | 52     | 1043    | 891   | 61.70%     |
| 1   | 10                                                                     | 20   | 30  | 40     | 50      | 60    | 70         |
| 5'  | TTTTGGTCTCAAGGTTCTAGAATGGAATGGAGTGGGGCTTTATCTTCTCTTGTCAGTAAGTGCAGGTG   |      |     |        |         |       |            |
| 5'  | TTTTGGTCTCAAGGTTCTAGAATGGAATGGAGTGGGGCTTTATCTTCTCTTGTCAGTAAGTGCAGGTG   |      |     |        |         |       |            |
| 52  | 61                                                                     | 71   | 81  | 91     | 101     | 111   | 121        |
| 71  | 80                                                                     | 90   | 100 | 110    | 120     | 130   | 140        |
|     | TCCACTCCCAGGTCCAGTTGCAGCAGTCTGGAGCTGAGCTGGTAAGGCCTGGGACTTCAGTGAAGATATC |      |     |        |         |       |            |
|     | TCCACTCCCAGGTCCAGTTGCAGCAGTCTGGAGCTGAGCTGGTAAGGCCTGGGACTTCAGTGAAGATATC |      |     |        |         |       |            |
| 122 | 131                                                                    | 141  | 151 | 161    | 171     | 181   | 191        |
| 141 | 150                                                                    | 160  | 170 | 180    | 190     | 200   | 210        |
|     | CTGCAAGGCTTCTGGATACGGCTTCACTAAGTCTGGCTCGGTTGGATAAAGCAGAGGCCTGGACATGGA  |      |     |        |         |       |            |
|     | CTGCAAGGCTTCTGGATACGGCTTCACTAAGTCTGGCTCGGTTGGATAAAGCAGAGGCCTGGACATGGA  |      |     |        |         |       |            |
| 192 | 201                                                                    | 211  | 221 | 231    | 241     | 251   | 261        |
| 211 | 220                                                                    | 230  | 240 | 250    | 260     | 270   | 280        |
|     | CTTGAGTGGATTGGAGATATTTACCCTGGAAGTGGTAATCTTACTACAATGAGAAGTTCAAGGGCAAAG  |      |     |        |         |       |            |
|     | CTTGAGTGGATTGGAGATATTTACCCTGGAAGTGGTAATCTTACTACAATGAGAAGTTCAAGGGCAAAG  |      |     |        |         |       |            |
| 262 | 271                                                                    | 281  | 291 | 301    | 311     | 321   | 331        |
| 281 | 290                                                                    | 300  | 310 | 320    | 330     | 340   | 350        |
|     | CCCACTGACTGCAGACAAATCCTCGAGCAGCTCTATATGCAGCTCAGTAGCCTGACATCTGAAGACTC   |      |     |        |         |       |            |
|     | CCCACTGACTGCAGACAAATCCTCGAGCAGCTCTATATGCAGCTCAGTAGCCTGACATCTGAAGACTC   |      |     |        |         |       |            |
| 332 | 341                                                                    | 351  | 361 | 371    | 381     | 391   | 401        |
| 351 | 360                                                                    | 370  | 380 | 390    | 400     | 410   | 420        |
|     | TACTGTCTATTTCTGTGCAAGAGAGGGGGGAATTACTACGGCTCCGTACCCGTTTGTTTACTGGGGCCAA |      |     |        |         |       |            |
|     | TACTGTCTATTTCTGTGCAAGAGAGGGGGGAATTACTACGGCTCCGTACCCGTTTGTTTACTGGGGCCAA |      |     |        |         |       |            |
| 402 | 411                                                                    | 421  | 431 | 441    | 451     | 461   | 471        |
| 421 | 430                                                                    | 440  | 450 | 460    | 470     | 480   | 490        |
|     | GGGACTCTGGTCACTGTCTCTGCAGCAAAACGACACCCCATCTGTCTATCCACTGGCCCTGGATCTG    |      |     |        |         |       |            |
|     | GGGACTCTGGTCACTGTCTCTGCAGCAAAACGACACCCCATCTGTCTATCCACTGGCCCTGGATCTG    |      |     |        |         |       |            |
| 472 | 481                                                                    | 491  | 501 | 511    | 521     | 531   | 541        |
| 491 | 500                                                                    | 510  | 520 | 530    | 540     | 550   | 560        |
|     | CTGCCAACTAACTCCATGGTGACCTGGGATGCCTGGTCAAGGGCTATTTCCCTGAGCCAGTGACAGT    |      |     |        |         |       |            |
|     | CTGCCAACTAACTCCATGGTGACCTGGGATGCCTGGTCAAGGGCTATTTCCCTGAGCCAGTGACAGT    |      |     |        |         |       |            |
| 542 | 551                                                                    | 561  | 571 | 581    | 591     | 601   | 611        |
| 561 | 570                                                                    | 580  | 590 | 600    | 610     | 620   | 630        |
|     | GACCTGGAACCTGGATCCCTGTCCAGCGGTGTGCACACCTCCAGCTGTCTGACGTCTGACCTCTAC     |      |     |        |         |       |            |
|     | GACCTGGAACCTGGATCCCTGTCCAGCGGTGTGCACACCTCCAGCTGTCTGACGTCTGACCTCTAC     |      |     |        |         |       |            |
| 612 | 621                                                                    | 631  | 641 | 651    | 661     | 671   | 681        |
| 631 | 640                                                                    | 650  | 660 | 670    | 680     | 690   | 700        |
|     | ACTCTGAGCAGCTCAGTGACTGTCCCCTCCAGCACCTGGCCAGCGAGACCTCACCTGCAACGTTGCC    |      |     |        |         |       |            |
|     | ACTCTGAGCAGCTCAGTGACTGTCCCCTCCAGCACCTGGCCAGCGAAACGTCACCTGCAACGTTGCC    |      |     |        |         |       |            |
| 682 | 691                                                                    | 701  | 711 | 721    | 731     | 741   | 751        |
| 701 | 710                                                                    | 720  | 730 | 740    | 750     | 760   | 770        |
|     | ACCCGGCCAGCAGCACCAAGGTGGACAAGAAATTGTGCCAGGGATTGGTTGTAAGCCTTGATATG      |      |     |        |         |       |            |
|     | ACCCGGCCAGCAGCACCAAGGTGGACAAGAAATTGTGCCAGGGATTGGTTGTAAGCCTTGATATG      |      |     |        |         |       |            |
| 752 | 761                                                                    | 771  | 781 | 791    | 801     | 811   | 821        |
| 771 | 780                                                                    | 790  | 800 | 810    | 820     | 830   | 840        |
|     | TACAGTCCCAGAAGTATCATCTGTCTTCTTCTTCCCCCAAAGCCCAAGGATGTGCTCACCATTACTCTG  |      |     |        |         |       |            |
|     | TACAGTCCCAGAAGTATCATCTGTCTTCTTCTTCCCCCAAAGCCCAAGGATGTGCTCACCATTACTCTG  |      |     |        |         |       |            |
| 822 | 831                                                                    | 841  | 851 | 861    | 871     | 881   | 891        |
| 841 | 850                                                                    | 860  | 870 | 880    | 890     | 900   | 910        |
|     | ACTCCTAAGTACAGTGTGTTGGTAGACATCAGCAAGGATGATCCCGAGGTCAGTTCAGCTGGTTTG     |      |     |        |         |       |            |
|     | ACTCCTAAGTACAGTGTGTTGGTAGACATCAGCAAGGATGATCCCGAGGTCAGTTCAGCTGGTTTG     |      |     |        |         |       |            |
| 892 | 901                                                                    | 911  | 921 | 931    | 941     | 951   | 961        |

Cont.

# Supplementary Data

| Simple Homology Region [mAbCCP HC(BIXI-KIBISI )] |                                                                         |      |     |        |         |       |            |
|--------------------------------------------------|-------------------------------------------------------------------------|------|-----|--------|---------|-------|------------|
| No.                                              | Target File                                                             | Mode | Key | Target | Overlap | Match | Percentage |
| 1                                                | CCP HC11-SP6                                                            | C    | 1   | 218    | 920     | 697   | 48.26%     |
| 1                                                | 10                                                                      | 20   | 30  | 40     | 50      | 60    | 70         |
| 5'                                               | GAGCTCGGTCTCAAGCGGTACCTATCATTTACCAGGAGAGTGGGAGAGGCTCTTCTCAGTATGGTGGTT   |      |     |        |         |       |            |
| 5'                                               | GAGCTCGGTCTCAAGCGGTACCTATCATTTACCAGGAGAGTGGGAGAGGCTCTTCTCAGTATGGTGGTT   |      |     |        |         |       |            |
| 218                                              | 227                                                                     | 237  | 247 | 257    | 267     | 277   | 287        |
| 71                                               | 80                                                                      | 90   | 100 | 110    | 120     | 130   | 140        |
|                                                  | GTGCAGGCCCTCATGTAACACAGAGCAGGTGAAAGTATTTCCCTGCCTCCCAGTTGCTCTTCTGCACATTG |      |     |        |         |       |            |
|                                                  | GTGCAGGCCCTCATGTAACACAGAGCAGGTGAAAGTATTTCCCTGCCTCCCAGTTGCTCTTCTGCACATTG |      |     |        |         |       |            |
| 288                                              | 297                                                                     | 307  | 317 | 327    | 337     | 347   | 357        |
| 141                                              | 150                                                                     | 160  | 170 | 180    | 190     | 200   | 210        |
|                                                  | AGCTTGCTGTAGACGAAGTAAGAGCCATCTGTGTCCATGATGGGCTGAGTGTCTTGTAAGTTCTCCGCTG  |      |     |        |         |       |            |
|                                                  | AGCTTGCTGTAGACGAAGTAAGAGCCATCTGTGTCCATGATGGGCTGAGTGTCTTGTAAGTTCTCCGCTG  |      |     |        |         |       |            |
| 358                                              | 367                                                                     | 377  | 387 | 397    | 407     | 417   | 427        |
| 211                                              | 220                                                                     | 230  | 240 | 250    | 260     | 270   | 280        |
|                                                  | GCTGCCCATTTCCACTGCCACTCCACAGTAATGTCTTTCAGGAAGAAGTCTGTTATCATGCAGGTCAGACT |      |     |        |         |       |            |
|                                                  | GCTGCCCATTTCCACTGCCACTCCACAGTAATGTCTTTCAGGAAGAAGTCTGTTATCATGCAGGTCAGACT |      |     |        |         |       |            |
| 428                                              | 437                                                                     | 447  | 457 | 467    | 477     | 487   | 497        |
| 281                                              | 290                                                                     | 300  | 310 | 320    | 330     | 340   | 350        |
|                                                  | GACTTTATCCTTGGCCATCTGCTCCTTGGGAGGTGGAATGGTGTACACCTGTGGAGCCTTCGGTCTGCCT  |      |     |        |         |       |            |
|                                                  | GACTTTATCCTTGGCCATCTGCTCCTTGGGAGGTGGAATGGTGTACACCTGTGGAGCCTTCGGTCTGCCT  |      |     |        |         |       |            |
| 498                                              | 507                                                                     | 517  | 527 | 537    | 547     | 557   | 567        |
| 351                                              | 360                                                                     | 370  | 380 | 390    | 400     | 410   | 420        |
|                                                  | TTGGTTTGGAGATGGTTTCTCGATGGGGGCAGGGAAGCTGCACTGTTGACCTGCAITTTGAACCTCCT    |      |     |        |         |       |            |
|                                                  | TTGGTTTGGAGATGGTTTCTCGATGGGGGCAGGGAAGCTGCACTGTTGACCTGCAITTTGAACCTCCT    |      |     |        |         |       |            |
| 568                                              | 577                                                                     | 587  | 597 | 607    | 617     | 627   | 637        |
| 421                                              | 430                                                                     | 440  | 450 | 460    | 470     | 480   | 490        |
|                                                  | TGCCATTGAGCCAGTCCCTGGTGCATGATGGGAAGTTCACTGACTGAGCGGAAAGTGTGTTGAACCTGCTC |      |     |        |         |       |            |
|                                                  | TGCCATTGAGCCAGTCCCTGGTGCATGATGGGAAGTTCACTGACTGAGCGGAAAGTGTGTTGAACCTGCTC |      |     |        |         |       |            |
| 638                                              | 647                                                                     | 657  | 667 | 677    | 687     | 697   | 707        |
| 491                                              | 500                                                                     | 510  | 520 | 530    | 540     | 550   | 560        |
|                                                  | CTCCCGGGGTGCGTCTGAGCTGTGTGCACCTCCACATCATCTACAAACCAGCTGAACCTGGACCTCGGGA  |      |     |        |         |       |            |
|                                                  | CTCCCGGGGTGCGTCTGAGCTGTGTGCACCTCCACATCATCTACAAACCAGCTGAACCTGGACCTCGGGA  |      |     |        |         |       |            |
| 708                                              | 717                                                                     | 727  | 737 | 747    | 757     | 767   | 777        |
| 561                                              | 570                                                                     | 580  | 590 | 600    | 610     | 620   | 630        |
|                                                  | TCATCCTTGCTGATGTCTACCACAACACAGTGACCTTAGGAGTCAGAGTAATGGTGAGCACATCCTTGG   |      |     |        |         |       |            |
|                                                  | TCATCCTTGCTGATGTCTACCACAACACAGTGACCTTAGGAGTCAGAGTAATGGTGAGCACATCCTTGG   |      |     |        |         |       |            |
| 778                                              | 787                                                                     | 797  | 807 | 817    | 827     | 837   | 847        |
| 631                                              | 640                                                                     | 650  | 660 | 670    | 680     | 690   | 700        |
|                                                  | GCITTTGGGGGGAAGATGAAGACAGATGATACTTCTGGGACTGTACATATGCAAGGCTTACAACCACAATC |      |     |        |         |       |            |
|                                                  | GCITTTGGGGGGAAGATGAAGACAGATGATACTTCTGGGACTGTACATATGCAAGGCTTACAACCACAATC |      |     |        |         |       |            |
| 848                                              | 857                                                                     | 867  | 877 | 887    | 897     | 907   | 917        |

CCT = GGA  
CCC = GGG

Figure S2. DNA sequence agliment of CCP-HC using SP6 and T7 primer.

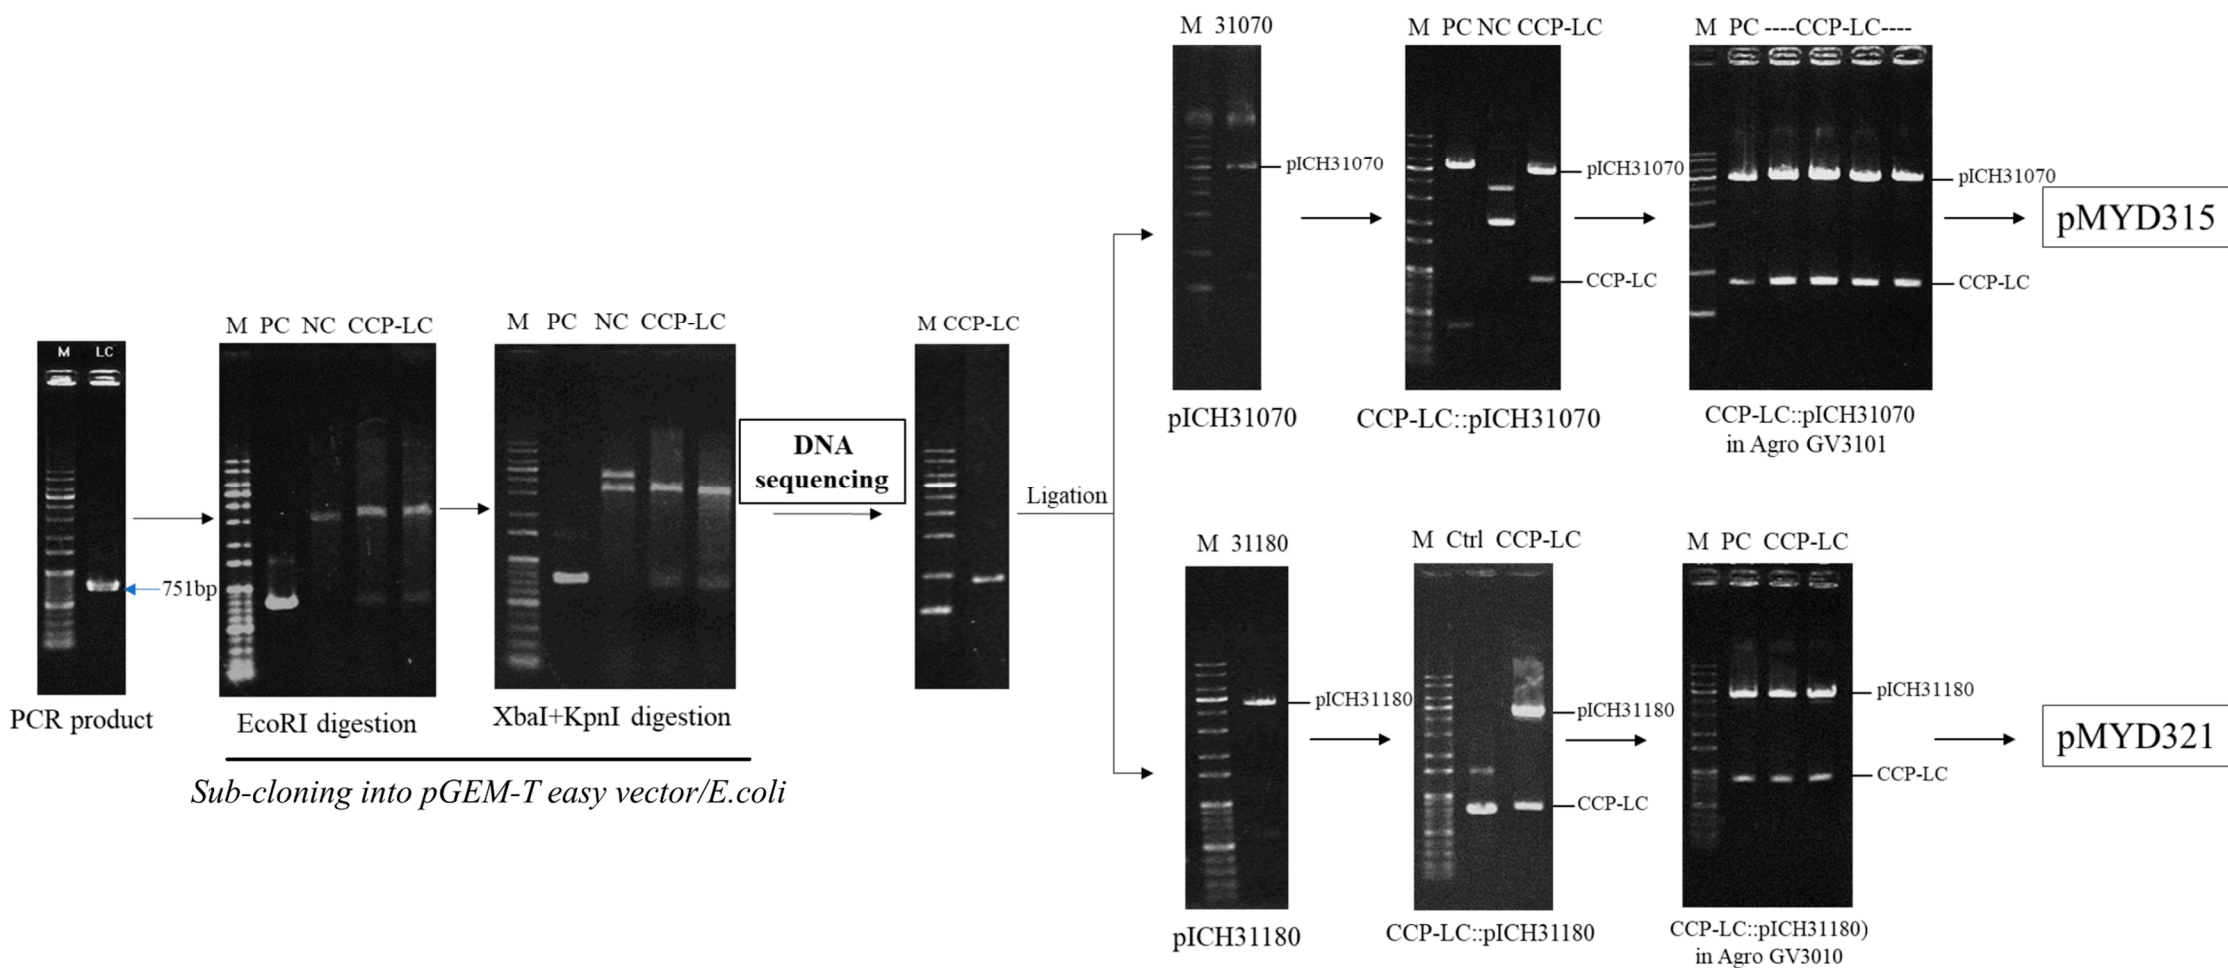

**Figure S3.** Cloning and construction of expression vectors for CCP-LC. The CCP-LC containing a BsaI site at the 5' end and the 3' end were subcloned into the pGEM-T easy vector and then confirmed by enzyme digestion before DNA sequencing. The BsaI-digested fragment of CCP-LC was eluted and cleaned up from agarose gel using the fragment DNA purification kit (iNtRON Biotechnology) then cloning into the plant expression vector pICH31070 and pICH31180, which resulted in pMYD315 and pMYD321, respectively. The expression vectors were transformed into *A. tumefaciens* GV3101 and then their plasmid DNA was isolated and confirmed by BsaI enzyme digestion. M is DNA ladder

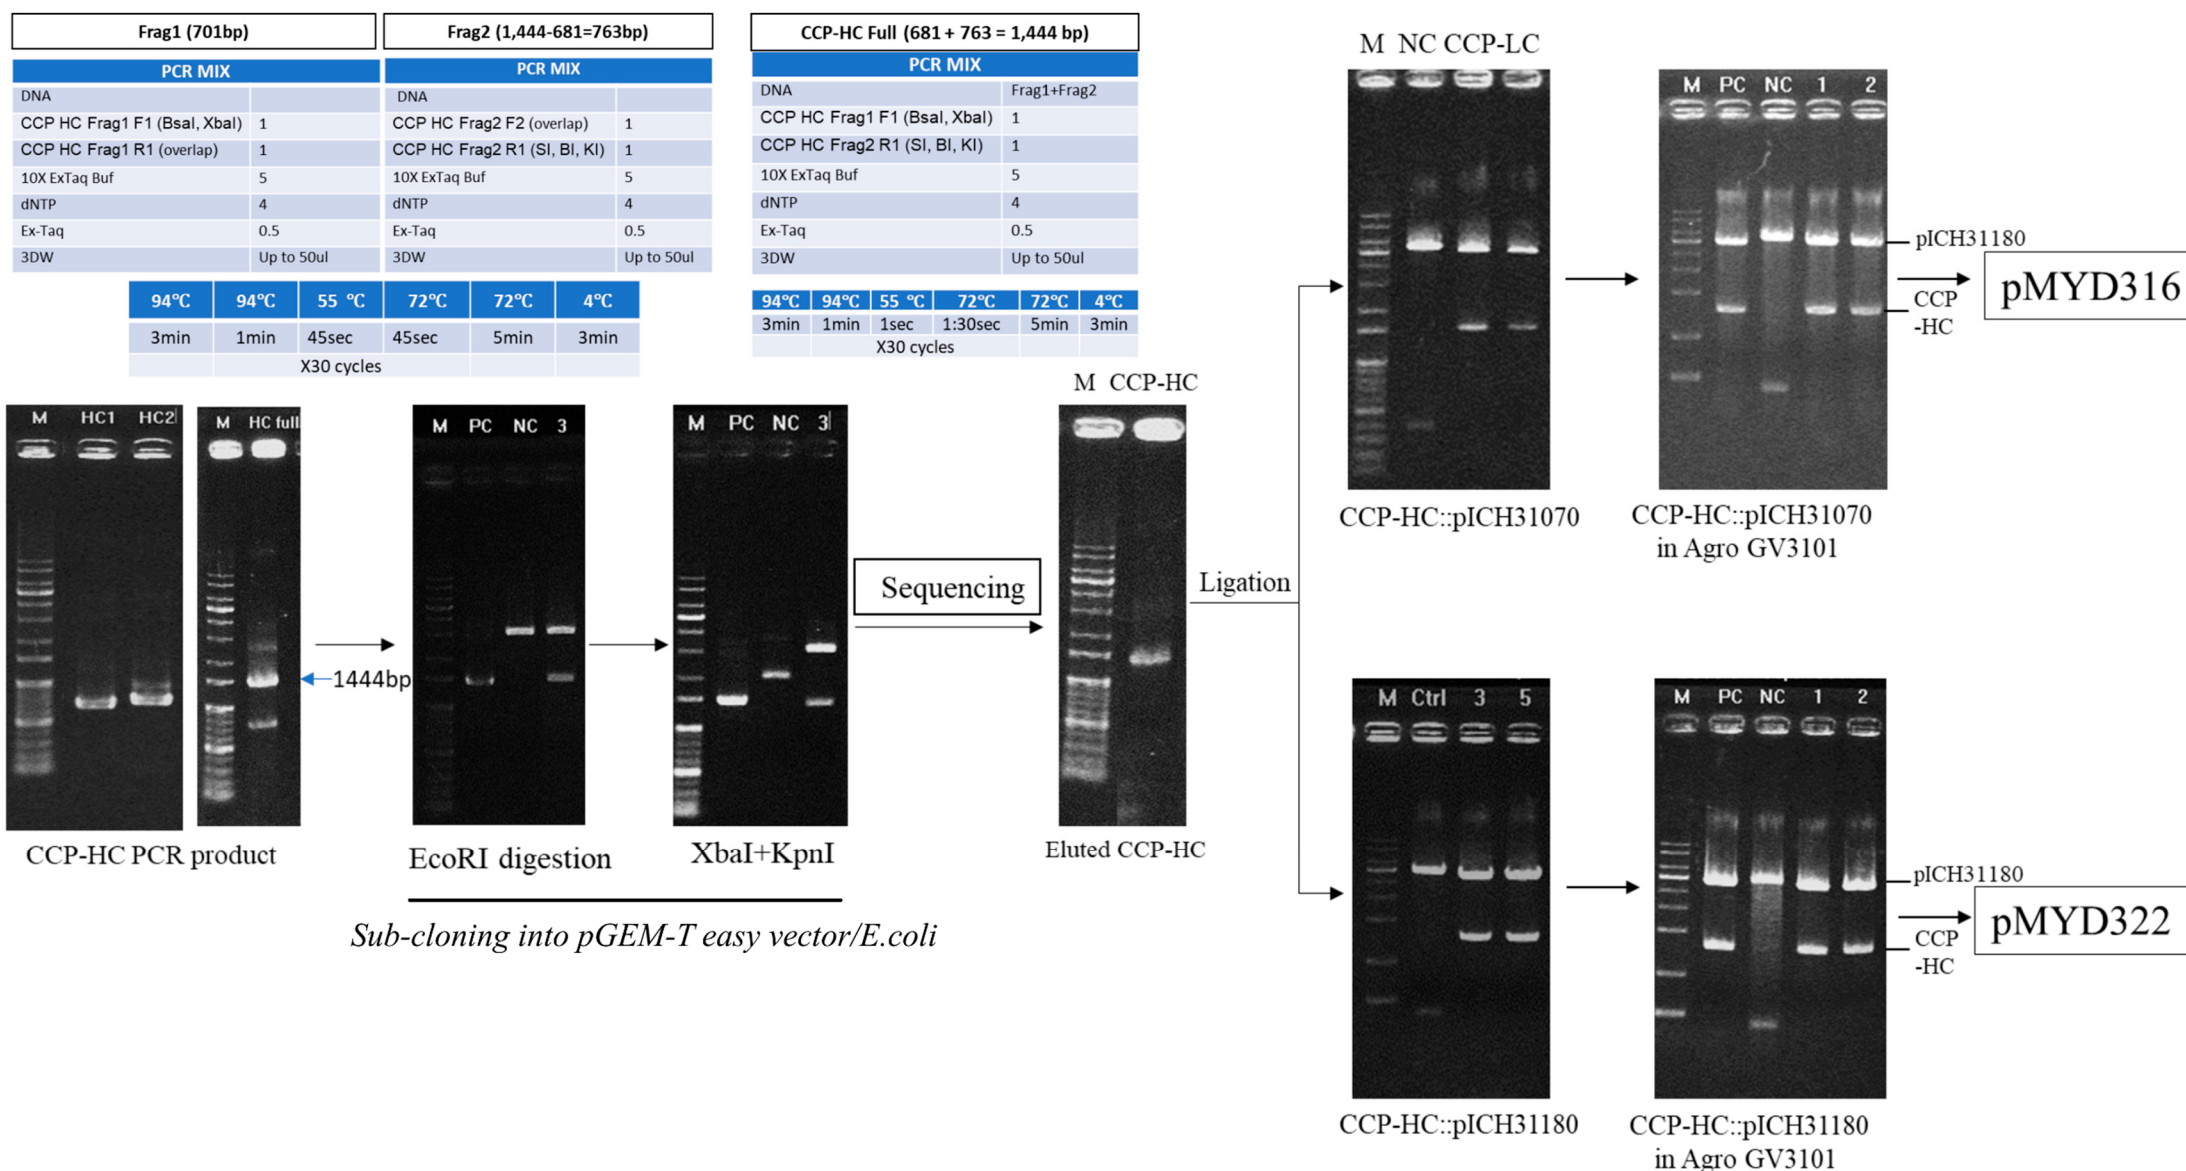

**Figure S4.** Cloning and construction of expression vectors for CCP-HC. The CCP-HC containing a BsaI site at the 5' end and the 3' end were subcloned into the pGEM-Teasy vector and then confirmed by enzyme digestion before DNA sequencing. The BsaI-digested fragment of CCP-HC was eluted and cleaned up from agarose gel and then cloning into the plant expression vector pICH31070 and pICH31180, which resulted in pMYD316 and pMYD322, respectively. The expression vectors were transformed into *A. tumefaciens* GV3101 and then their plasmid DNA was isolated and confirmed by BsaI enzyme digestion. M is DNA ladder.
